# Supplementary material
Source: ML conference proceedings conference paper supplement (https://openreview.net/forum?id=sz7HdeVVHo)

TS2Vec

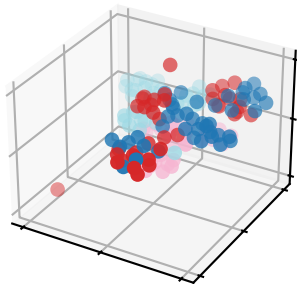

Topo-TS2Vec

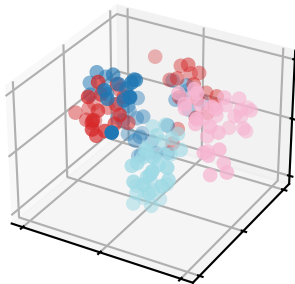

GGeo-TS2Vec

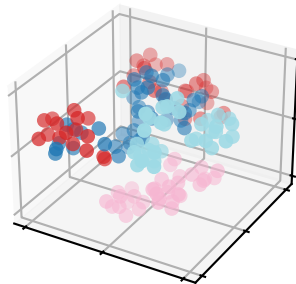

SoftCLT

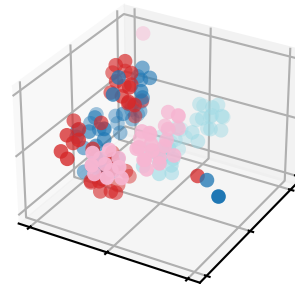

Topo-SoftCLT

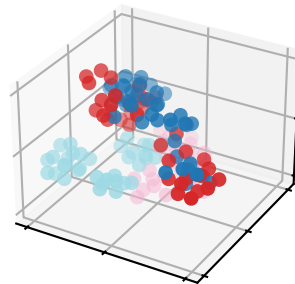

GGeo-SoftCLT

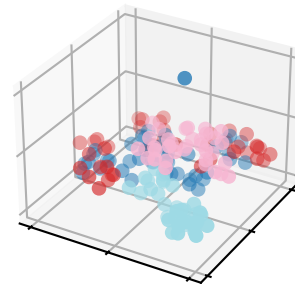

Supplement: supplementary_material [file attachment]

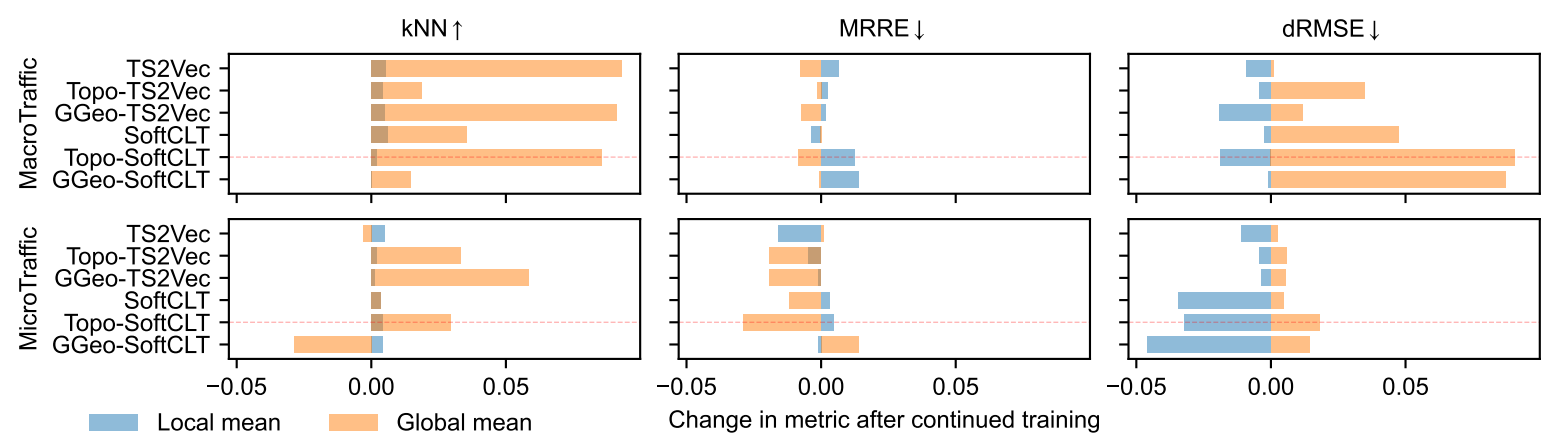

Supplement: supplementary_material [file attachment]

TS2Vec

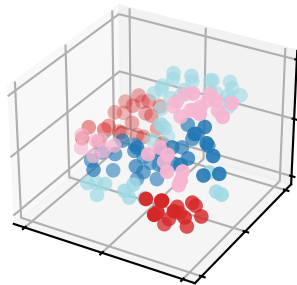

Topo-TS2Vec

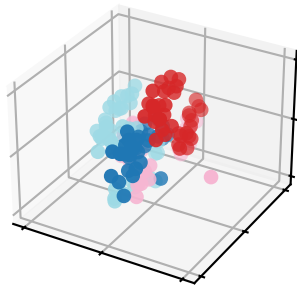

GGeo-TS2Vec

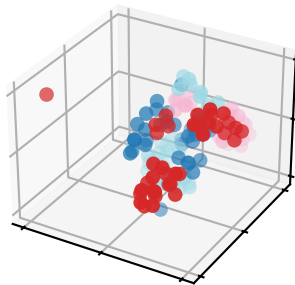

SoftCLT

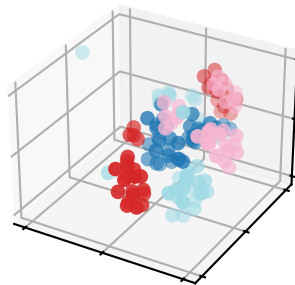

Topo-SoftCLT

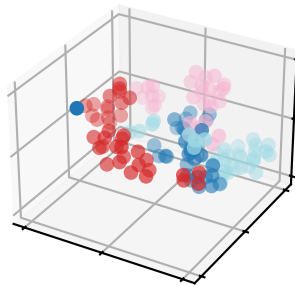

GGeo-SoftCLT

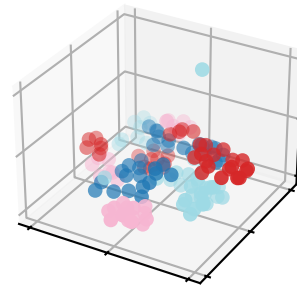

Supplement: supplementary_material [file attachment]
